# Supplementary material for: Dispersed emergence and protracted domestication of polyploid wheat uncovered by mosaic ancestral haploblock inference
Source: PubMed Central journal article supplement (PMC9259585; doi:10.1038/s41467-022-31581-0), 2022-07-06
Supplement: 41467_2022_31581_MOESM3_ESM.pdf [file 41467_2022_31581_MOESM3_ESM.pdf]

### **Description of Additional Supplementary Files**

File Name: Supplementary Data 1

Description: Passport information of whole-genome resequencing accessions in this study.

File Name: Supplementary Data 2

Description: AHG type of all 5 Mbp windows for 386 accessions in the A&B subgenomes.

File Name: Supplementary Data 3

Description: AHG type of all 5 Mbp windows for 313 accessions in D subgenomes.

File Name: Supplementary Data 4

Description: Genotype of chloroplast genome for 306 accessions.

File Name: Supplementary Data 5

Description: Windows with signature of selection detected in more than one evolutionary stages.

File Name: Supplementary Data 6

Description: Windows with signature of fixation detected.

File Name: Supplementary Data 7

Description: Frequency of presence in four taxonomic groups for 46 CEB.

File Name: Supplementary Data 8

Description: Presence and absence of the predominant AHG type around domestication-related and adaptation-related genes.

File Name: Supplementary Data 9

Description: centAHG type of 386 accessions for 14 A&B chromosomes.

File Name: Supplementary Data 10

Description: Inferred centAHG-3B type of additional 240 hexaploid landrace accessions.
